# Supplementary material for: Enhancement of the Antibacterial Activity of Silver Nanoparticles against Phytopathogenic BacteriumRalstonia solanacearumby Stabilization
Source: Hindawi journal article supplement (doi:10.1155/2016/7135852), 2016-01-01
Supplement: f1 [file 7135852.f1.pdf]

# Enhancement of the antibacterial activity of silver nanoparticles against phytopathogenic bacterium *Ralstonia solanacearum* by stabilization

Juanni Chen, Shili Li, Jinxiang Luo, Rongsheng Wang, Wei Ding\*

Laboratory of Natural Product Pesticide, College of Plant protection, Southwest University, Chongqing, 400715, P.R. China.

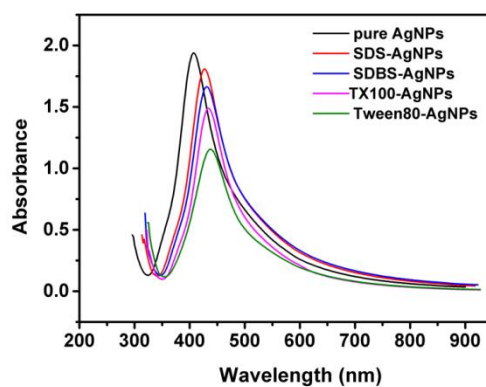

**Figure S1.** The UV-vis absorption spectrum of synthesized AgNPs and surfactants-stabilized AgNPs.



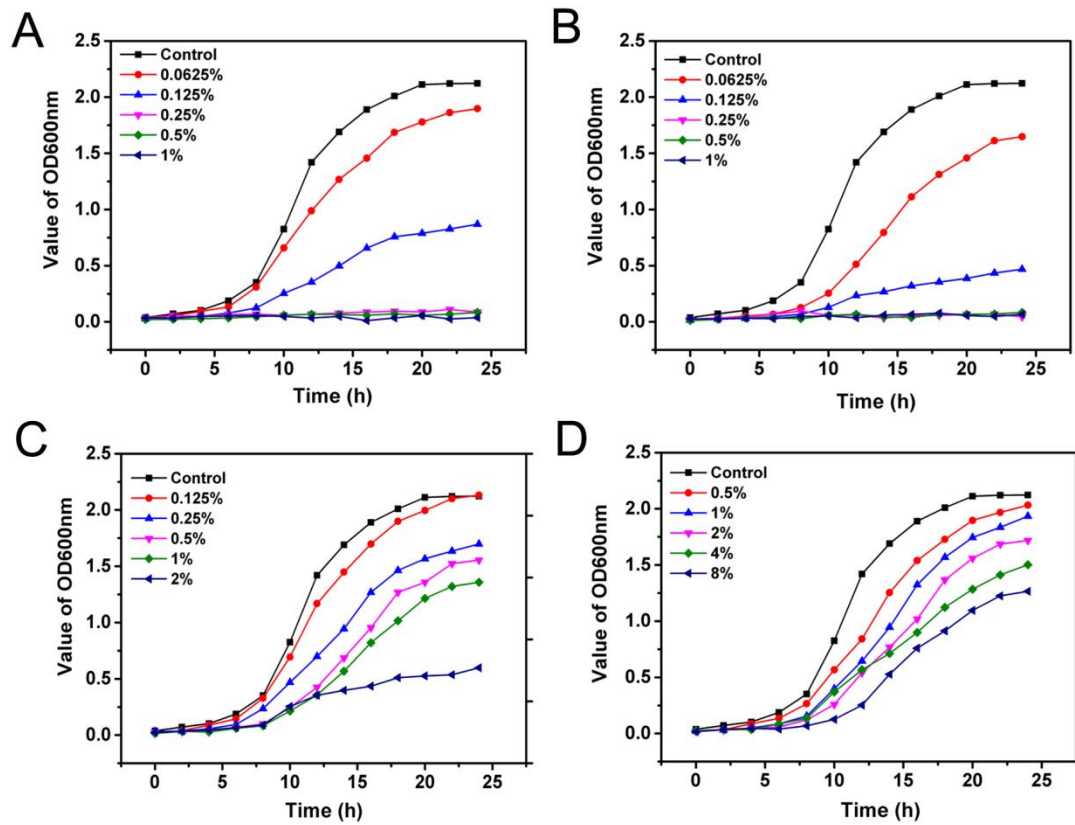

**Figure S2.** Growth kinetic curve of *R. solanacearum* in the presence of different concentrations of pure SDS (A), SDBS (B), TX-100 (C) and Tween 80 (D).
